# Supplementary material
Source: PubMed Central journal article supplement (PMC2729599)
Supplement: tpc.108.063107_1.pdf [file tpc.108.063107_1.pdf]

Supplemental Data. Furch et al. (2009). Sieve-element  $\text{Ca}^{2+}$  channels as relay stations between remote stimuli and sieve-tube occlusion in *Vicia faba*.

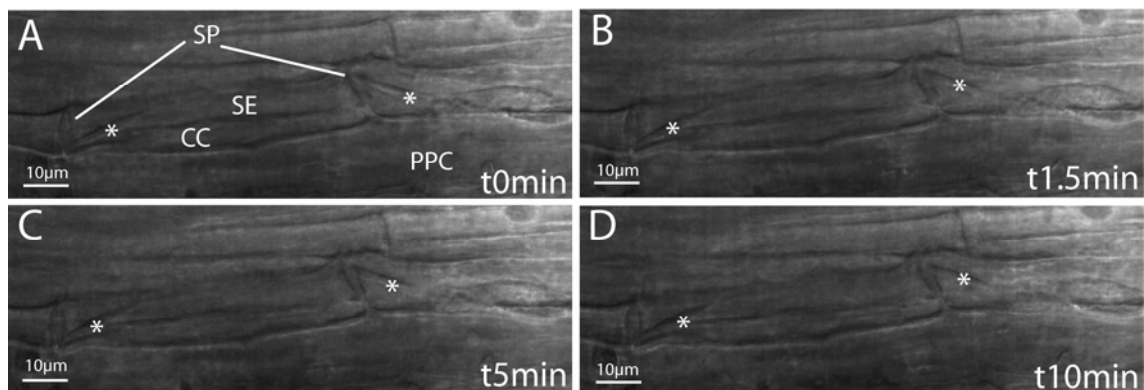

**Supplemental Figure 1. The effect of the  $\text{Ca}^{2+}$ -channel blocker  $\text{Gd}^{3+}$  on the forisome reaction in phloem tissue.**

Forisome reaction was observed microscopically during the passage of an electropotential wave in response to a remote burning stimulus, in the presence of 2 mM  $\text{Gd}^{3+}$ . Forisome conformation before (A) and after a burning stimulus (B-D). The time after stimulus application is indicated in each photomicrograph. The cell-impermeant  $\text{Ca}^{2+}$ -channel blocker abolished the forisome (marked with an asterisk) dispersion. CC, companion cells; PPC, phloem parenchyma cell; SE, sieve element; SP, sieve plate.

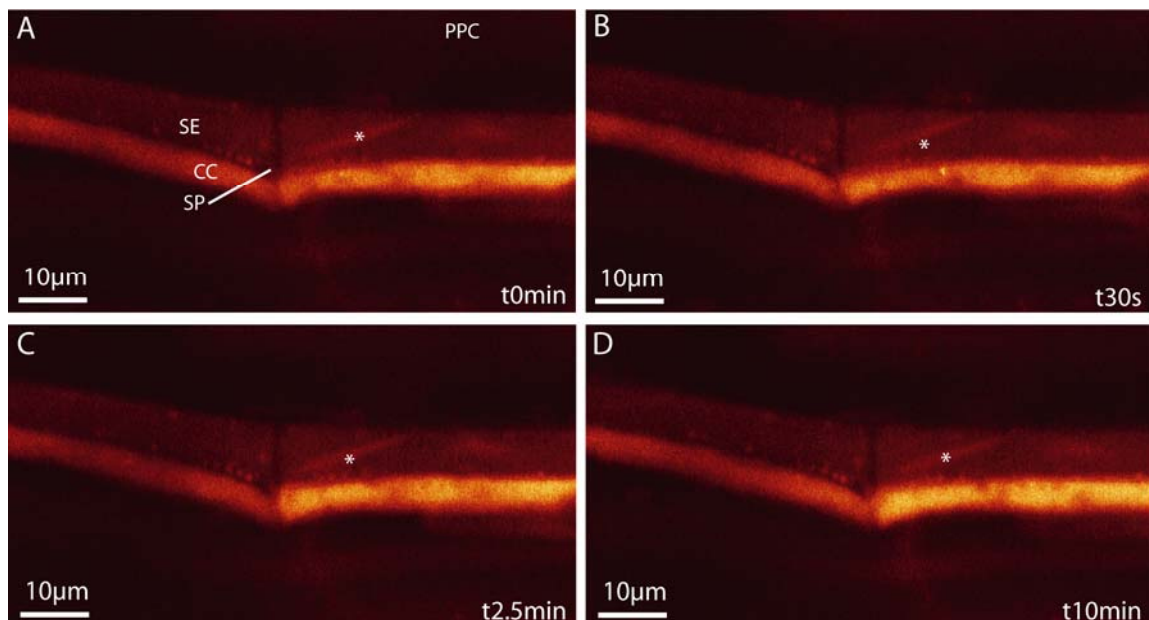

**Supplemental Figure 2. The effect of the  $\text{Ca}^{2+}$ -channel blocker verapamil on the forisome reaction in phloem tissue.**

CLSM micrographs of *Vicia faba* phloem tissue, stained with the fluorescence dye CMEDA/CMFDA, to highlight the forisome (marked with an asterisk). The cell-permeant  $\text{Ca}^{2+}$ -channel blocker verapamil ( $100 \mu\text{M}$ ) was sufficient to inhibit forisome dispersion in response to remote burning stimuli in intact phloem tissue. Forisome conformation before (A) and after a burning stimulus (B-D). The time after stimulus application is indicated in each photomicrograph. CC, companion cells; PPC, phloem parenchyma cell; SE, sieve element; SP, sieve plate.

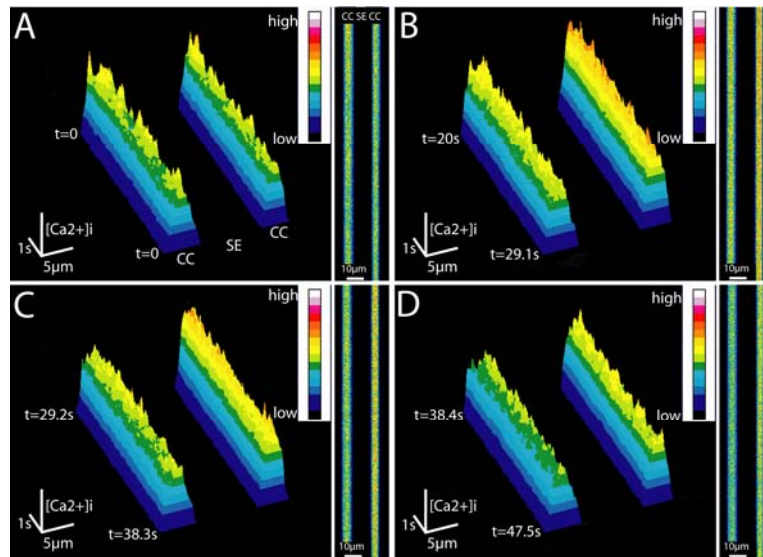

### Supplemental Figure 3. Rapid line scan measurements of $\text{Ca}^{2+}$ transients.

Line scan measurements (right rectangle of each figure) recorded from an CC/SE/CC region in intact phloem tissue stained with the  $\text{Ca}^{2+}$ -dependent fluorescence dye Oregon Green. For clearness, line scans were converted into surface plots (left side of each figure) using Image J software.  $\text{Ca}^{2+}$  concentration (relative quantity) is coded by the height and the color of the surface. (A-D) Visualization of release of free  $\text{Ca}^{2+}$  triggered by a 100 mM KCl stimulus. (A) The resting  $\text{Ca}^{2+}$  level (scanned during 9.1s) before applying the stimulus. (B-D) A continuous scan between 20 and 47.5s after application of KCl to the apical window.

### Supplemental Methods

**Rapid line scan measurements of  $\text{Ca}^{2+}$  transients** - To reach a higher temporal resolution of  $\text{Ca}^{2+}$  dynamics in case of distant KCl treatments, the line-scan mode of CLSM was used, e.g. a single line was chosen (17.6 msec per line) and repeatedly scanned with a frequency of 57 Hz. The scanned lines were sequentially plotted next to one another to construct a  $(x,t)$  linescan image. Typically 512 successive line-

scans were executed. These images contain spatial information in one dimension at a high temporal resolution (Bischofberger and Schild, 1995).

**Fluorescent probes** - The voltage-sensitive styryl dye RH-414 (-N-(3-triethylammoniumpropyl)-4-(4-(4-(diethylamino)phenyl)butadienyl)pyridiniumdibromide) was used to label the PM. A 5 mg ml<sup>-1</sup> stock solution was prepared in dimethyl sulfoxide (DMSO). Working solutions were prepared as a 1:2000 dilution to give a final concentration of 4.3 μM RH-414 and applied as 100-500 μl droplets.

A mixture of CellTracker Yellow-Green CMEDA (5-chloromethyleosin-diacetate) and CellTracker Green CMFDA (5-chloromethylfluorescein-diacetate) was used to highlight forisomes in SEs. Stock solutions of 7.8 mg ml<sup>-1</sup> CMEDA and 4.65 mg ml<sup>-1</sup> CMFDA were made up in DMSO. Immediately prior to use, 1 μl of each stock solution was mixed and diluted into 1 ml bathing medium.

To label Ca<sup>2+</sup> channels with DM BODIPY dihydropyridine (fl-DHP), 25 μg of BODIPY DHP was dissolved in 5 μl DMSO and 495 μl bathing medium to give a stock solution. Immediately before use, 1 μl of the stock solution was diluted in 2 ml bathing medium to give a final concentration 0.036 μM (for Ca<sup>2+</sup>-channel distribution). For fl-DHP binding studies, fl-DHP stock solution was diluted to various concentrations between 10 and 2000 nM using bathing medium. Binding affinity was obtained by measuring the averaged pixel density from the recorded fl-DHP images following background correction using Image J-software. Titration curve fitting was carried out using Microcal Origin 3.5 (Northampton, MA, USA).

To label the ER in SEs, ER-Tracker Green (glibenclamide BODIPY FL) and ER-Tracker Red (glibenclamide BODIPY TR) were used at a final concentration of 0.5 μM. Stock solutions were prepared by dissolving 100 μg of ER-Tracker Green in 128 μl DMSO and 100 μg of ER-Tracker Red in 110 μl DMSO. The stock solutions were diluted 1:2000 with bathing medium before incubating the tissue for at least 1h. In double-staining studies, intact phloem tissue was pre-incubated with 1 mM Pluronic F-127 (Molecular Probes, Eugene OR) to facilitate loading of ER-Tracker Red into the SE. To test unspecific binding of the fluorophore to phloem cells, tissue was saturated with 1 μM glibenclamide (dissolved in DMSO and diluted with bathing medium) 1h before application of the ER-Tracker to the exposed phloem tissue for 1h. Subsequent scanning by CLSM revealed no significant staining with ER-Tracker, indicating the respective receptor in the ER was saturated with unlabelled

glibenclamide. To co-localize Ca<sup>2+</sup> channels with the ER, tissue was incubated for at least 1h with ER-Tracker Red. Successful staining of the phloem tissue by ER-Tracker Red was verified by CLSM, and the phloem tissue was then stained with DM-BODIPY dihydropyridine (fl-DHP) for 2h.

All fluorescent probes were purchased from Molecular Probes (Eugene, OR).

**Isolation of SEPs** - In brief, an upper internode from a 3-4 week old *Vicia faba* plant was excised and split by a tangential cut. For crude isolation of stem phloem strands comprising intact SE/CC complexes, tangential tissue slices with a thickness of ~300 µm were made with a razor blade from the cut face of the internode. The tissue slices were transferred into a wall digestion medium (Hafke et al., 2007) and incubated overnight at room temperature.

**Electron microscopical preparation of phloem tissue** - To obtain phloem tissue windows for slow fixation, cortical tissue was locally removed by manual paradermal slicing with a fresh razor blade, while avoiding damage to the phloem in intact plants. Large segments of about 5 cm length and 2 cm width containing the phloem window were excised under recovery medium (10 mM KCl, 10 mM CaCl<sub>2</sub>, 5 mM NaCl) and remained submerged for 2h. At the start of fixation (during 9h at room temperature), the recovery medium was replaced by a 5% aldehyde solution. Following primary fixation, tissues were postfixed in 1% osmium tetroxide overnight, washed with H<sub>2</sub>O, stained with 0.5% uranyl acetate, and then dehydrated in a graded ethanol series. Sections were cut with a diamond knife on a Reichert Om U2 ultramicrotome (Leica, Bensheim, Germany) and post-stained with 2% uranyl acetate and lead citrate (Reynolds, 1963).
